# Supplementary material for: Embryonic lethality is not sufficient to explain hourglass-like conservation of vertebrate embryos
Source: PubMed Central journal article supplement (PMC5855935; doi:10.1186/s13227-018-0095-0), 2018-03-16

replicate #1

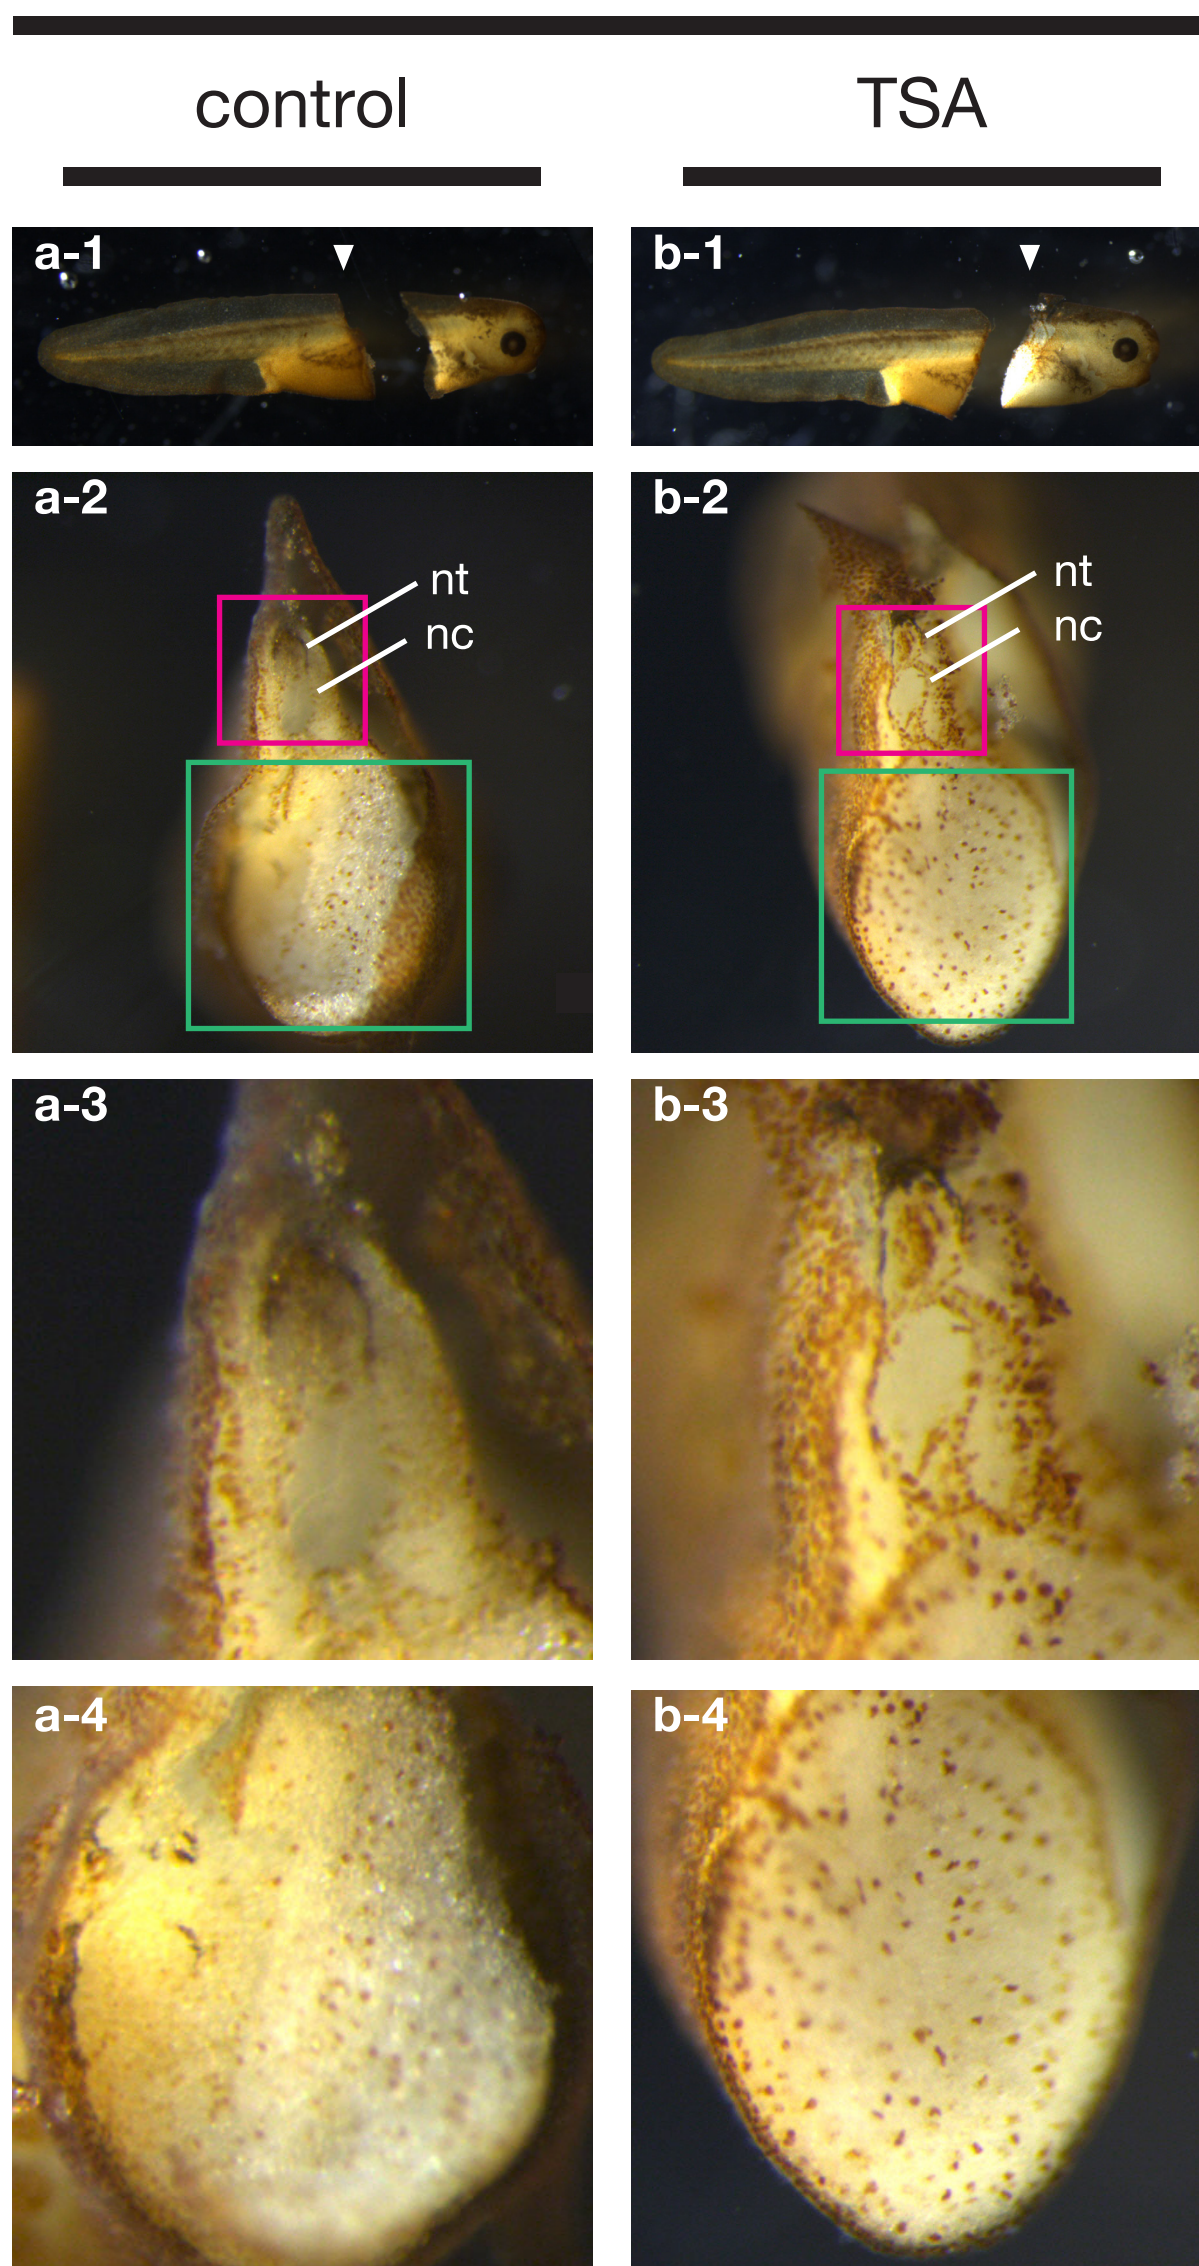

replicate #2

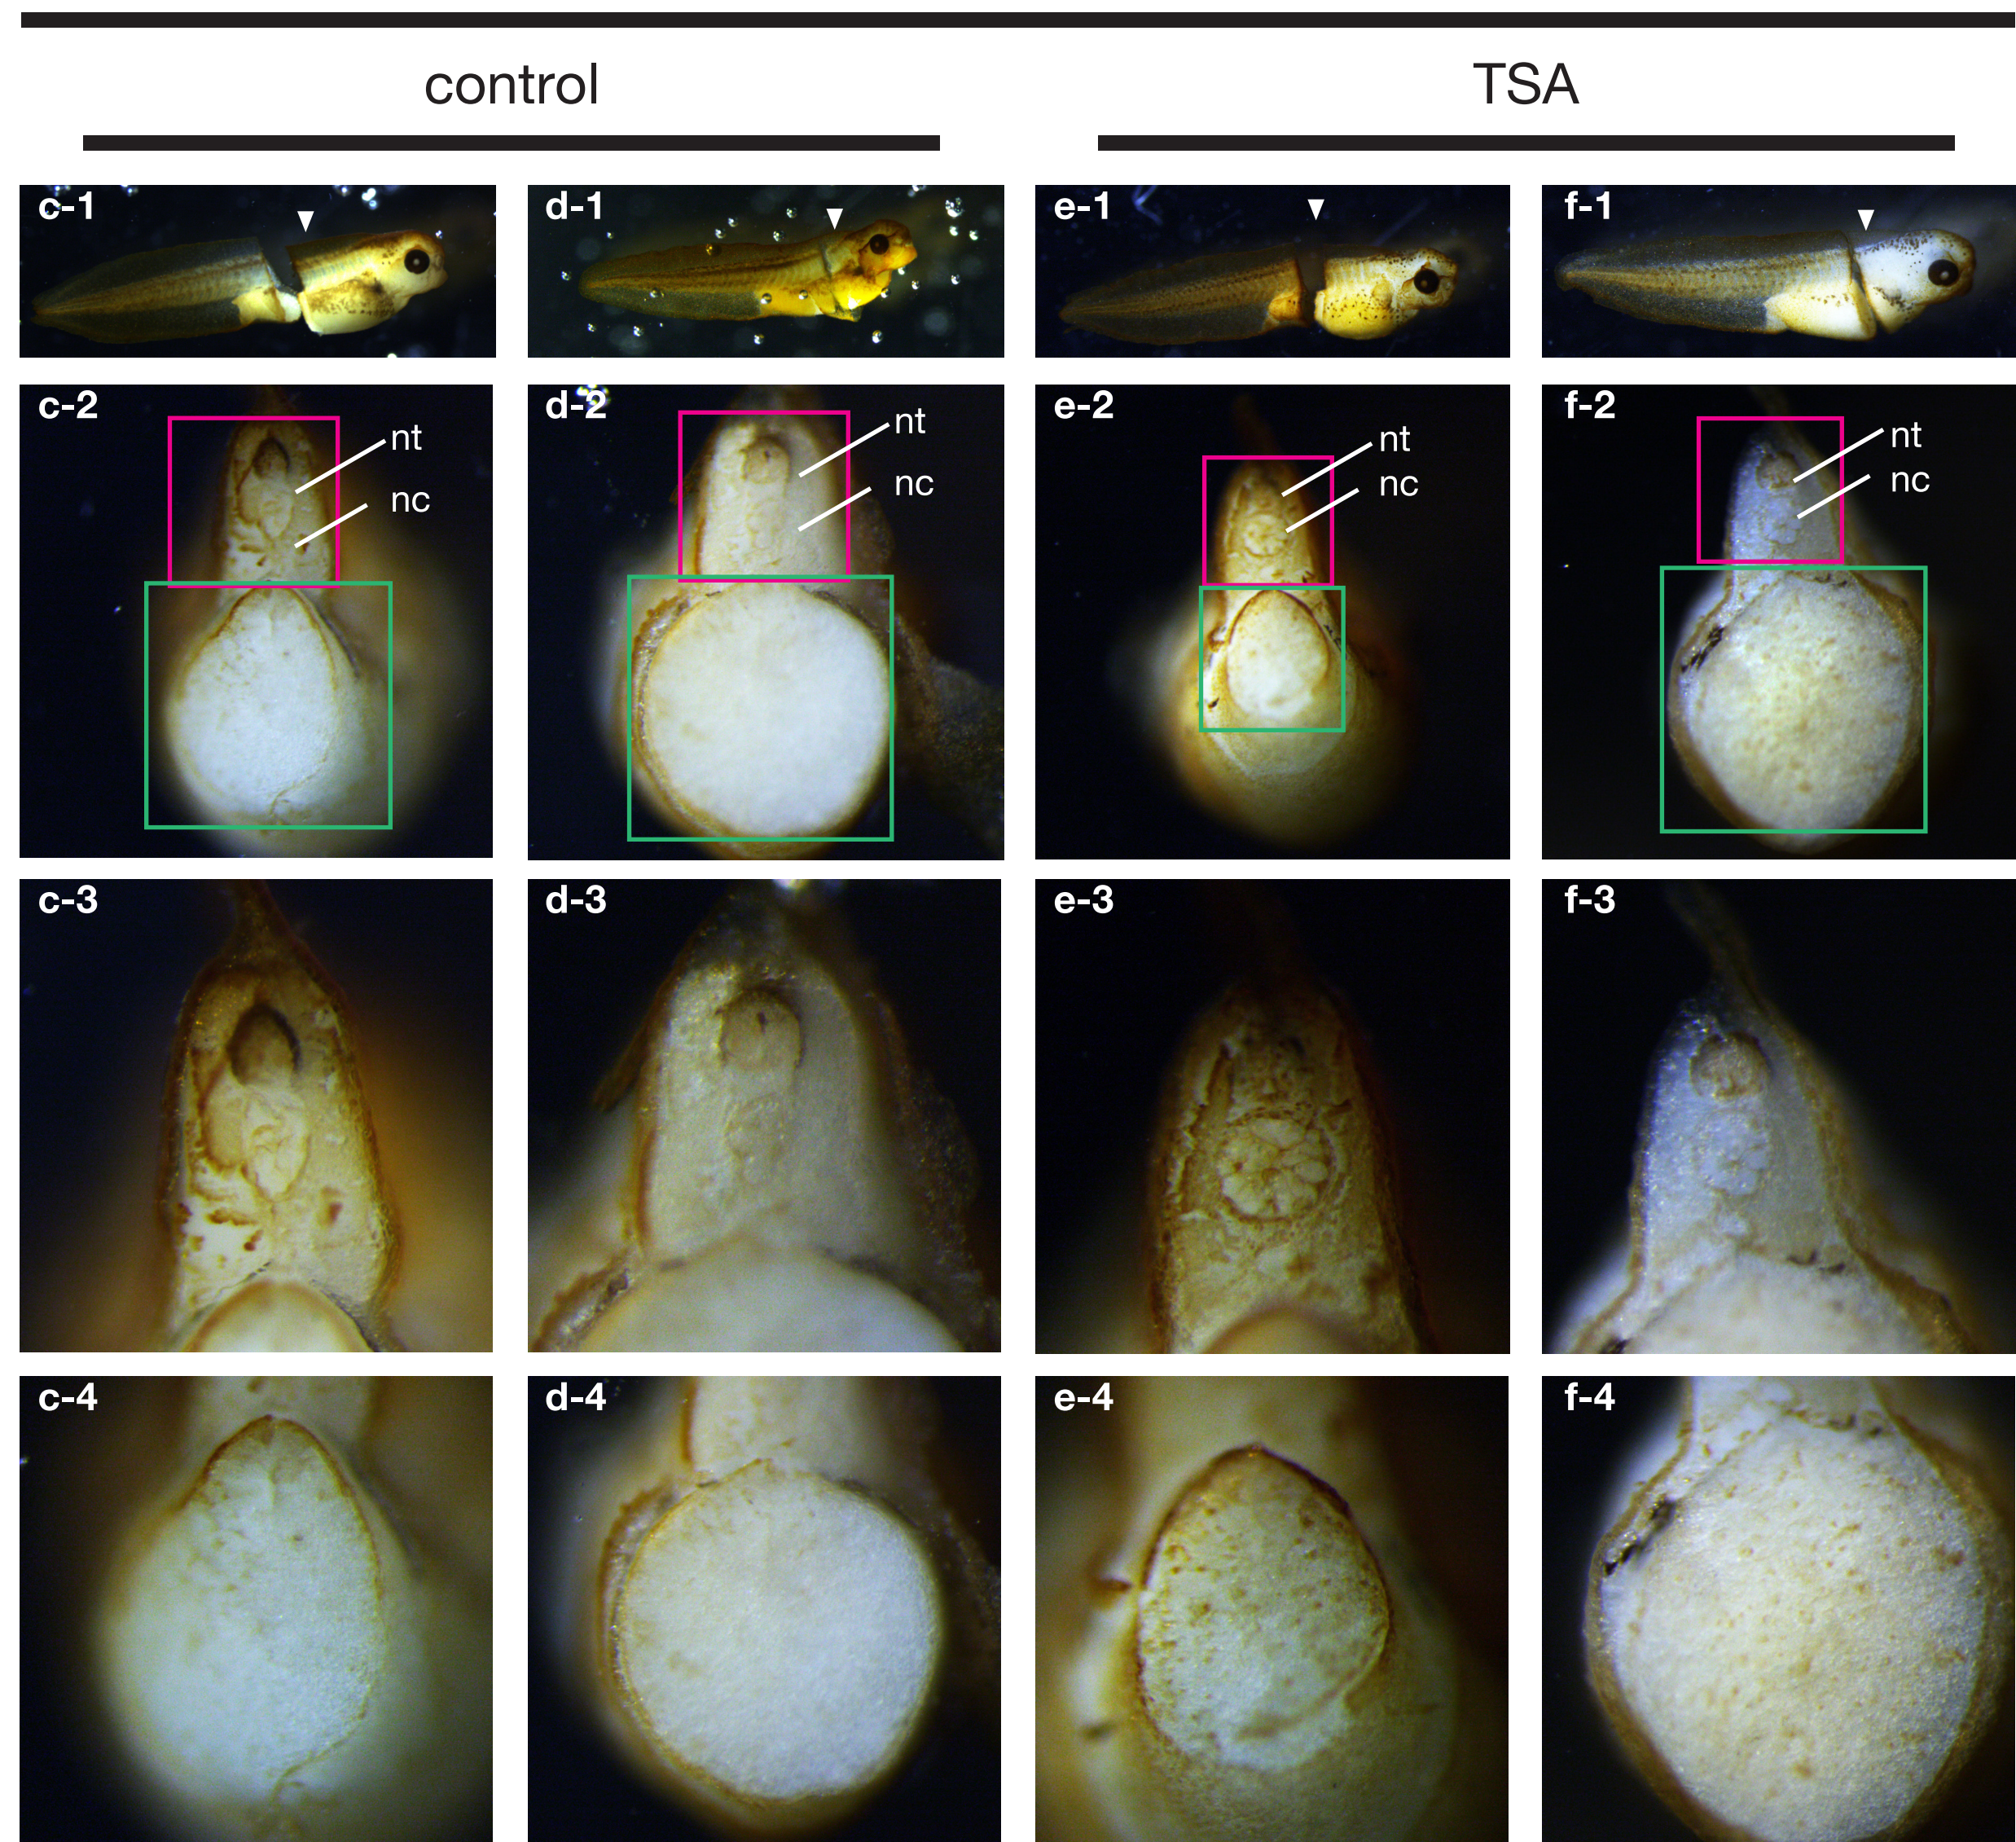

Supplement: 13227_2018_95_MOESM2_ESM.pdf [file 13227_2018_95_MOESM2_ESM.pdf]
